# Supplementary material
Source: HighWire-hosted journal article supplement (https://erj.ersjournals.com/content/56/3/2000513)
Supplement: inline-supplementary-material-1 [file inline-supplementary-material-1.pdf]

**Supplementary Table 1S: Comparison between included and excluded patients due to missing echocardiographic data**

| Variable               | Study population | Excluded patients | P value |
|------------------------|------------------|-------------------|---------|
|                        | N = 517          | N = 89            |         |
| Age, years             | 52 ± 15          | 55 ± 17           | 0.132   |
| Female (%)             | 316 (64.8)       | 70 (78.7)         | 0.010   |
| WHO FC III-IV (%)      | 339 (66.1)       | 64 (71.9)         | 0.281   |
| Monotherapy, %         | 160 (32.4)       | 29 (33.3)         | 0.862   |
| Combination therapy, % | 215 (43.5)       | 32 (36.8)         | 0.241   |

**List of abbreviations:** WHO FC, World Health Organization functional class

**Supplementary Table 2S: Adjusted HRs for all-cause mortality per 1 increase in echocardiographic risk category**

| Adjusted for                                                                        | HR per 1 echocardiographic risk category increase (95% CI) | P value |
|-------------------------------------------------------------------------------------|------------------------------------------------------------|---------|
| 1) Age, gender, incident/prevalent, year of publication, WHO FC, LVEF               | 1.96 (1.55-2.46)                                           | <0.001  |
| 2) Age, gender, incident/prevalent, year of publication, WHO FC, heart rate, LVEF   | 1.86 (1.46-2.37)                                           | <0.001  |
| 3) Age, gender, incident/prevalent, year of publication, WHO FC, LVEF, PAH etiology | 2.11 (1.65-2.71)                                           | <0.001  |
| 4) Age, gender, incident/prevalent, year of publication, 6MWD, LVEF                 | 2.38 (1.45-3.91)                                           | 0.001   |
| 5) Age, gender, incident/prevalent, year of publication, WHO FC, LVEF, AcT          | 1.96 (1.50-2.55)                                           | <0.001  |
| 6) Age, gender, incident/prevalent, year of publication, WHO FC, LVEF, RVEDA        | 2.01 (1.31-3.08)                                           | 0.001   |
| 7) Age, gender, incident/prevalent, year of publication, WHO FC, LVEF, RA area      | 1.92 (1.32-2.80)                                           | 0.001   |
| 8) Age, gender, incident/prevalent, year of publication, WHO FC, LVEF, PASP         | 1.94 (1.49-2.53)                                           | <0.001  |

These analyses were conducted based on data availability, multivariable Cox regression model 1 included 444 patients, model 2 405 patients, model 3 367 patients, model 4 135 patients, model 5 385 patients, model 6 194 patients, model 7 277 patients, and model 8 352 patients.

List of abbreviations: AcT, acceleration time; HR, hazard ratio; LVEF, left ventricular ejection fraction; PAH, pulmonary arterial hypertension; RA, right atrial; RV EDA, right ventricular end diastolic area; 6MWD, 6-minute walking distance; WHO FC, World Health Organization functional class

# Supplementary Table 3S. Univariable and multivariable Cox regression analysis with a multivariable Cox

regression model including: age, gender, incident prevalent, WHO FC, RA area, and LVEF

|                                                     | Univariate Analysis<br>HR (95% CI) | P value | Multivariate Analysis<br>HR (95% CI) | P value |
|-----------------------------------------------------|------------------------------------|---------|--------------------------------------|---------|
| Age                                                 | 1.02 (1.01-1.03)                   | <0.001  | 1.03 (1.02-1.05)                     | <0.001  |
| Female sex                                          | 0.71 (0.53-0.94)                   | 0.017   | 0.87 (0.57-1.33)                     | 0.521   |
| Heart rate                                          | 1.02 (1.01-1.03)                   | 0.002   |                                      |         |
| PVOD*                                               | 5.00 (2.50-10.00)                  | <0.001  |                                      |         |
| Scleroderma PAH*                                    | 1.50 (0.90-2.50)                   | 0.121   |                                      |         |
| Connective tissue disease PAH*                      | 2.80 (1.49-5.26)                   | 0.001   |                                      |         |
| Incident PAH <sup>§</sup>                           | 1.67 (1.16-2.41)                   | 0.006   | 1.83 (0.78-4.33)                     | 0.165   |
| Combination therapy <sup>°</sup>                    | 1.16 (0.88-1.54)                   | 0.293   |                                      |         |
| Study published in 2016-18 <sup>Δ</sup>             | 0.55 (0.36-0.83)                   | 0.005   | 0.26 (0.03-2.01)                     | 0.196   |
| Data from retrospective study <sup>£</sup>          | 0.90 (0.66-1.21)                   | 0.484   |                                      |         |
| WHO FC III-IV                                       | 2.96 (2.02-4.34)                   | <0.001  | 2.30 (1.36-2.89)                     | 0.002   |
| 6MWD, per 10 m increase                             | 0.96 (0.94-0.98)                   | <0.001  |                                      |         |
| Center location in USA                              | 0.83 (0.60-1.18)                   | 0.301   |                                      |         |
| TAPSE <sup>#</sup>                                  | 0.92 (0.89-0.94)                   | <0.001  |                                      |         |
| TAPSE ≤17 mm                                        | 2.37 (1.78-3.14)                   | <0.001  |                                      |         |
| RVEDD                                               | 1.01 (1.00-1.02)                   | 0.076   |                                      |         |
| RVEDA                                               | 1.05 (1.02-1.07)                   | <0.001  |                                      |         |
| FAC                                                 | 0.97 (0.95-0.99)                   | 0.008   |                                      |         |
| AcT                                                 | 0.98 (0.97-0.99)                   | <0.001  |                                      |         |
| PASP                                                | 1.01 (1.00-1.01)                   | 0.006   |                                      |         |
| RA area                                             | 1.04 (1.02-1.06)                   | <0.001  | 1.04 (1.02-1.06)                     | <0.001  |
| Pericardial effusion                                | 1.33 (0.69-2.59)                   | 0.396   |                                      |         |
| Dilated IVC                                         | 1.95 (1.46-2.64)                   | <0.001  |                                      |         |
| TR moderate to severe                               | 2.00 (1.43-2.79)                   | <0.001  |                                      |         |
| LVEDV                                               | 0.99 (0.97-0.99)                   | 0.005   |                                      |         |
| LVEF                                                | 0.98 (0.97-0.99)                   | 0.002   | 1.01 (0.99-1.02)                     | 0.509   |
| Intermediate- <sup>†</sup> vs low-risk <sup>‡</sup> | 2.15 (1.38-3.37)                   | 0.001   |                                      |         |
| High- <sup>¥</sup> vs low-risk <sup>‡</sup>         | 4.54 (2.88-7.15)                   | <0.001  |                                      |         |

\* versus idiopathic PAH

§ versus prevalent PAH

° versus monotherapy or no specific therapy

Δ versus 2006-2011

£ versus prospective study

# as a continuous variable

† Group 2 and 3

‡ Group 1

¥ Group 4

List of abbreviations: HR, hazard ratio; CI, confidence interval; PAH, pulmonary arterial hypertension; WHO FC, world health organization functional class; 6MWD, six-minute walking distance; TAPSE, tricuspid annular plane systolic excursion; RVEDD, right ventricular end diastolic diameter; RVEDA, right ventricular end diastolic area; FAC, fractional area change; AcT, acceleration time; PASP, pulmonary arterial systolic pressure; RA, right atrial; IVC, inferior vena cava; TR, tricuspid regurgitation; LVEDV, left ventricular end diastolic volume; LV EF, left ventricular ejection fraction.

**Supplementary Figure 1S: Association between individual and combined echocardiographic parameters with all-cause mortality.**

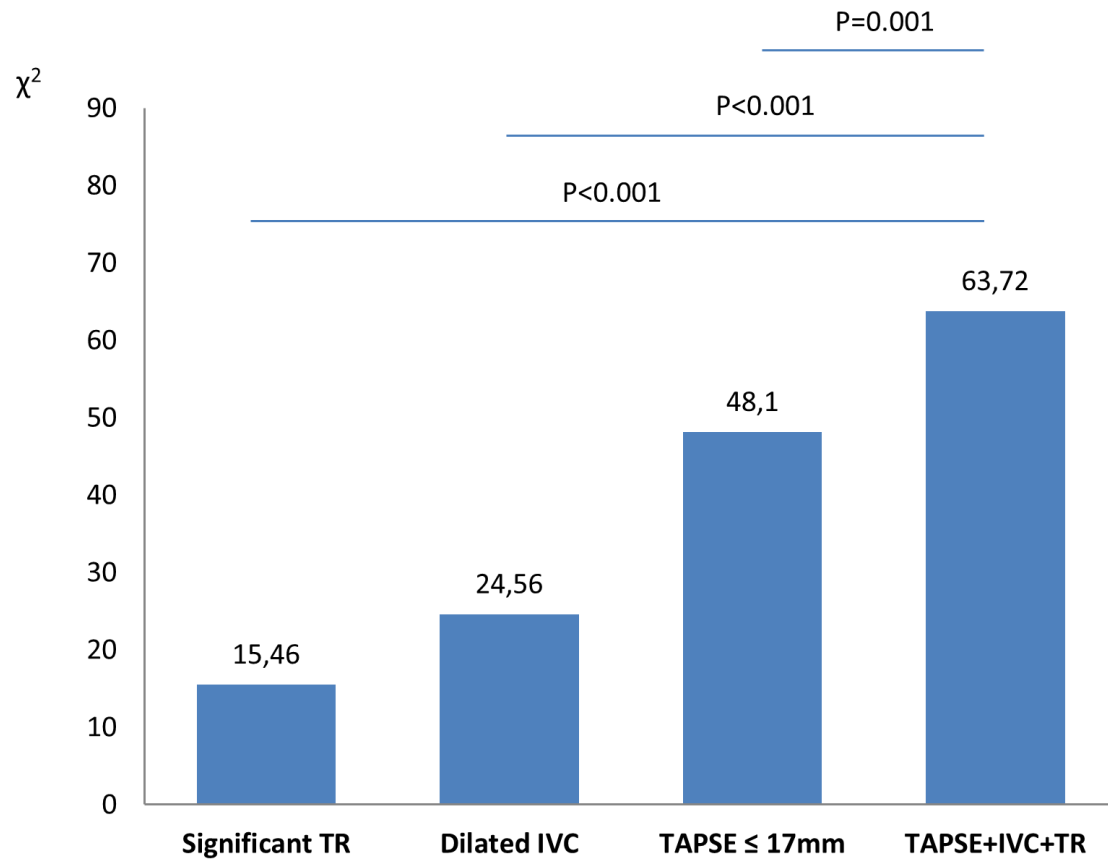

The model  $\chi^2$  values are presented for a series of Cox regression analysis model: the combination of significant TR, dilated IVC and decreased TAPSE is associated with a significant increase in  $\chi^2$  value compared with the use of these parameters individually.

This analysis was conducted on patients that had all the parameters included in the Cox regression models available (440).

IVC = inferior vena cava; TAPSE = tricuspid annular plane systolic excursion; TR = tricuspid regurgitation

**Supplementary Figure 2S.** Incremental prognostic value of the proposed stratification model compared with RA area

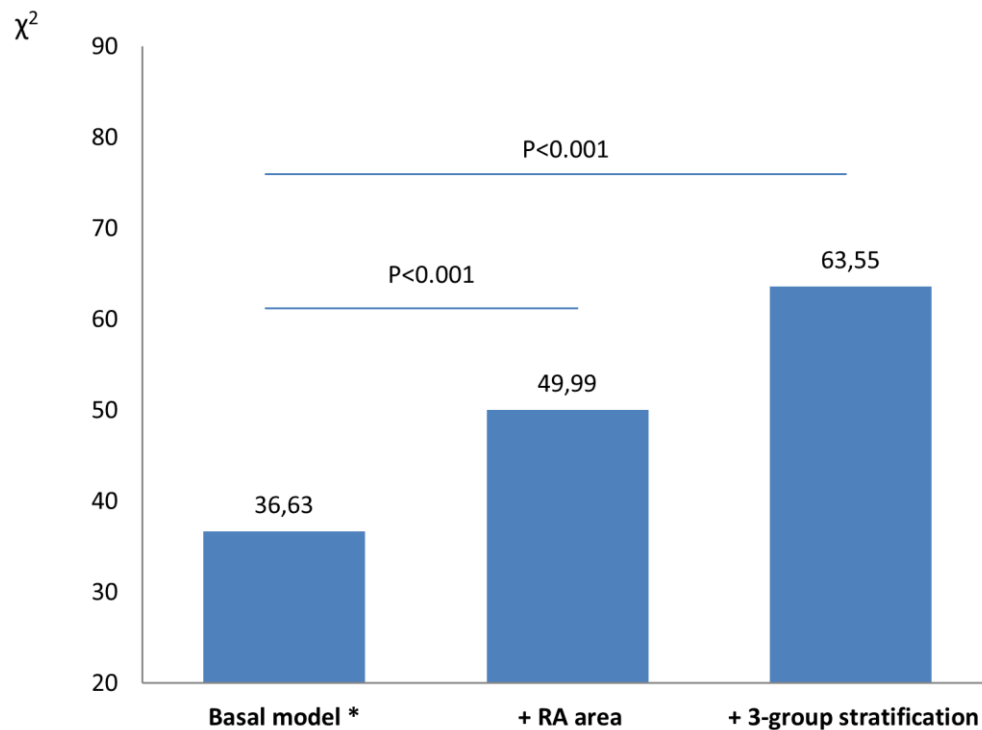

\*The basal model includes age, gender, WHO class III-IV, year of study publication, incident/prevalent, and LVEF. This analysis was conducted based on data availability and included 277 patients.

The model  $\chi^2$  values are presented for a series of Cox regression analysis model: the proposed risk stratification into 3 groups based on TAPSE, IVC dilation and TR severity when added to the basal model is associated with a higher increase in the  $\chi^2$  value compared with the addition of RA area.

The first blue bar from the left shows the  $\chi^2$  of the basal model; the second one the  $\chi^2$  value of the basal model + RA area and the third the  $\chi^2$  value of the basal model + our 3-groups risk stratification.

IVC = inferior vena cava; RA = right atrial; TAPSE = tricuspid annular plane systolic excursion; TR = tricuspid regurgitation
