# Supplementary material
Source: HighWire-hosted journal article supplement (https://erj.ersjournals.com/content/56/3/2000513)
Supplement: inline-supplementary-material-2 [file inline-supplementary-material-2.pdf]

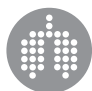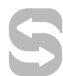

SHAREABLE PDF

# A comprehensive echocardiographic method for risk stratification in pulmonary arterial hypertension

Stefano Ghio<sup>1,9</sup>, Valentina Mercurio<sup>2,3,9</sup>, Federico Fortuni<sup>1,4,9</sup>, Paul R. Forfia<sup>5</sup>, Henning Gall<sup>6</sup>, Ardeschir Ghofrani<sup>6</sup>, Stephen C. Mathai<sup>2</sup>, Jeremy A. Mazurek<sup>7</sup>, Monica Mukherjee<sup>8</sup>, Manuel Richter<sup>6</sup>, Laura Scelsi<sup>1</sup>, Paul M. Hassoun<sup>2,10</sup> and Khodr Tello<sup>6,10</sup>, TAPSE in PAH investigators<sup>11</sup>

**Affiliations:** <sup>1</sup>Division of Cardiology, Fondazione IRCCS Policlinico San Matteo, Pavia, Italy. <sup>2</sup>Division of Pulmonary and Critical Care Medicine, Johns Hopkins University School of Medicine, Baltimore, MD, USA. <sup>3</sup>Dept of Translational Medical Sciences, Federico II University, Naples, Italy. <sup>4</sup>Dept of Molecular Medicine, Unit of Cardiology, University of Pavia, Pavia, Italy. <sup>5</sup>Pulmonary Hypertension, Right Heart Failure and Pulmonary Thromboendarterectomy Program, Temple University Hospital, Philadelphia, PA, USA. <sup>6</sup>University Hospital Giessen und Marburg GmbH, Pulmonary Hypertension Division, Medical Clinic II, Giessen, Germany. <sup>7</sup>Dept of Medicine, Perelman School of Medicine at the University of Pennsylvania, Philadelphia, PA, USA. <sup>8</sup>Division of Cardiology, Johns Hopkins University School of Medicine, Baltimore, MD, USA. <sup>9</sup>These authors contributed equally as co-first authors. <sup>10</sup>These authors contributed equally as co-last authors. <sup>11</sup>A full list of the TAPSE in PAH investigators can be found in the acknowledgements section.

**Correspondence:** Stefano Ghio, Divisione di Cardiologia, Fondazione IRCCS Policlinico San Matteo, Piazza Golgi 19, 27100 Pavia, Italy. E-mail: s.ghio@smatteo.pv.it

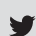

@ERSpublications

The proposed comprehensive echocardiographic approach reflecting both RV pump function and systemic venous congestion is highly effective in risk stratification of PAH patients, outperforming the prognostic parameters suggested by current guidelines <https://bit.ly/3fDiaUI>

**Cite this article as:** Ghio S, Mercurio V, Fortuni F, *et al.* A comprehensive echocardiographic method for risk stratification in pulmonary arterial hypertension. *Eur Respir J* 2020; 56: 2000513 [<https://doi.org/10.1183/13993003.00513-2020>].

This single-page version can be shared freely online.

## ABSTRACT

**Question addressed:** Echocardiography is not currently considered as providing sufficient prognostic information to serve as an integral part of treatment goals in pulmonary arterial hypertension (PAH). We tested the hypothesis that incorporation of multiple parameters reflecting right heart function would improve the prognostic value of this imaging modality.

**Methods and main results:** We pooled individual patient data from a total of 517 patients (mean age 52±15 years, 64.8% females) included in seven observational studies conducted at five European and United States academic centres. Patients were subdivided into three groups representing progressive degrees of right ventricular dysfunction based on a combination of echocardiographic measurements, as follows. Group 1 (low risk): normal tricuspid annular plane systolic excursion (TAPSE) and nonsignificant tricuspid regurgitation (TR) (n=129); group 2 (intermediate risk): normal TAPSE and significant TR or impaired TAPSE and nondilated inferior vena cava (IVC) (n=256); group 3 (high risk): impaired TAPSE and dilated IVC (n=132). The 5-year cumulative survival rate was 82% in group 1, 63% in group 2 and 43% in group 3. Low-risk patients had better survival rates than intermediate-risk patients (log-rank Chi-squared 12.25; p<0.001) and intermediate-risk patients had better survival rates than high-risk patients (log-rank Chi-squared 26.25; p<0.001). Inclusion of other parameters such as right atrial area and pericardial effusion did not provide added prognostic value.

**Answer to the question:** The proposed echocardiographic approach integrating the evaluation of TAPSE,

TR grade and IVC is effective in stratifying the risk for all-cause mortality in PAH patients, outperforming the prognostic parameters suggested by current guidelines.
